# Supplementary figures and images for: A Zn-doped Sb2Te3 flexible thin film with decoupled Seebeck coefficient and electrical conductivity via band engineering
Source: Royal Society of Chemistry journal article supplement (doi:10.1039/d4sc07793h), 2025-01-01

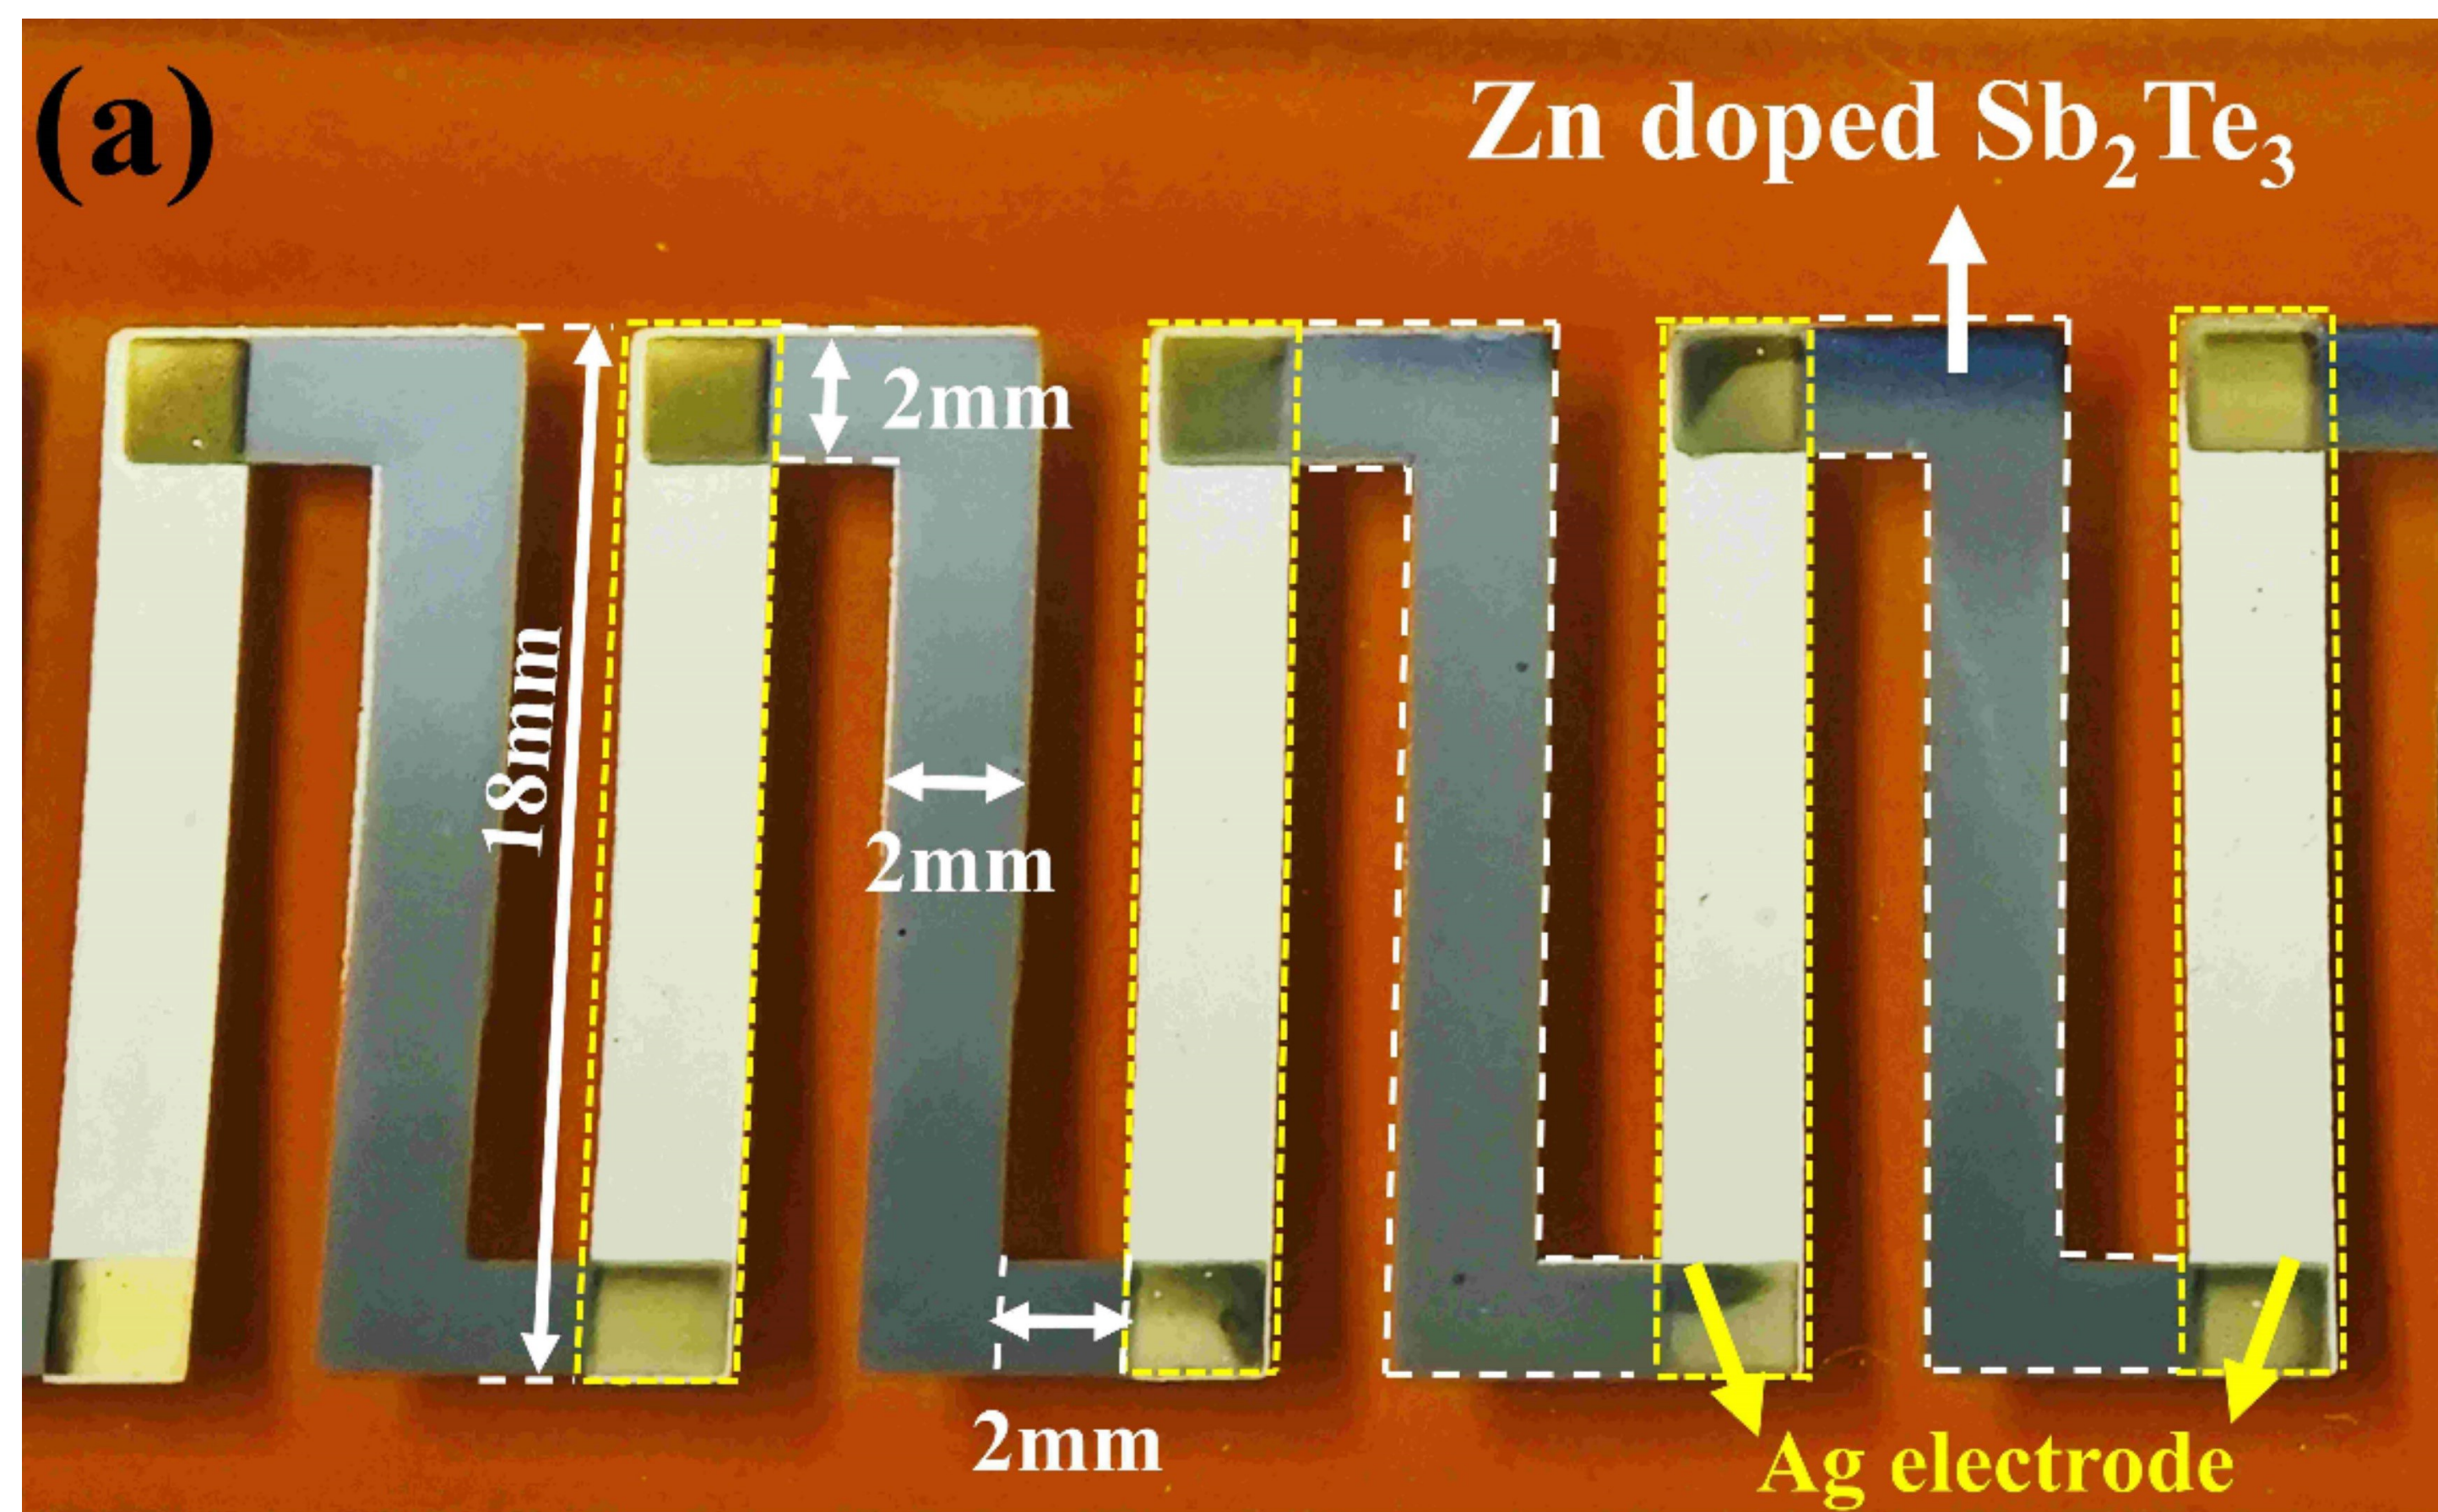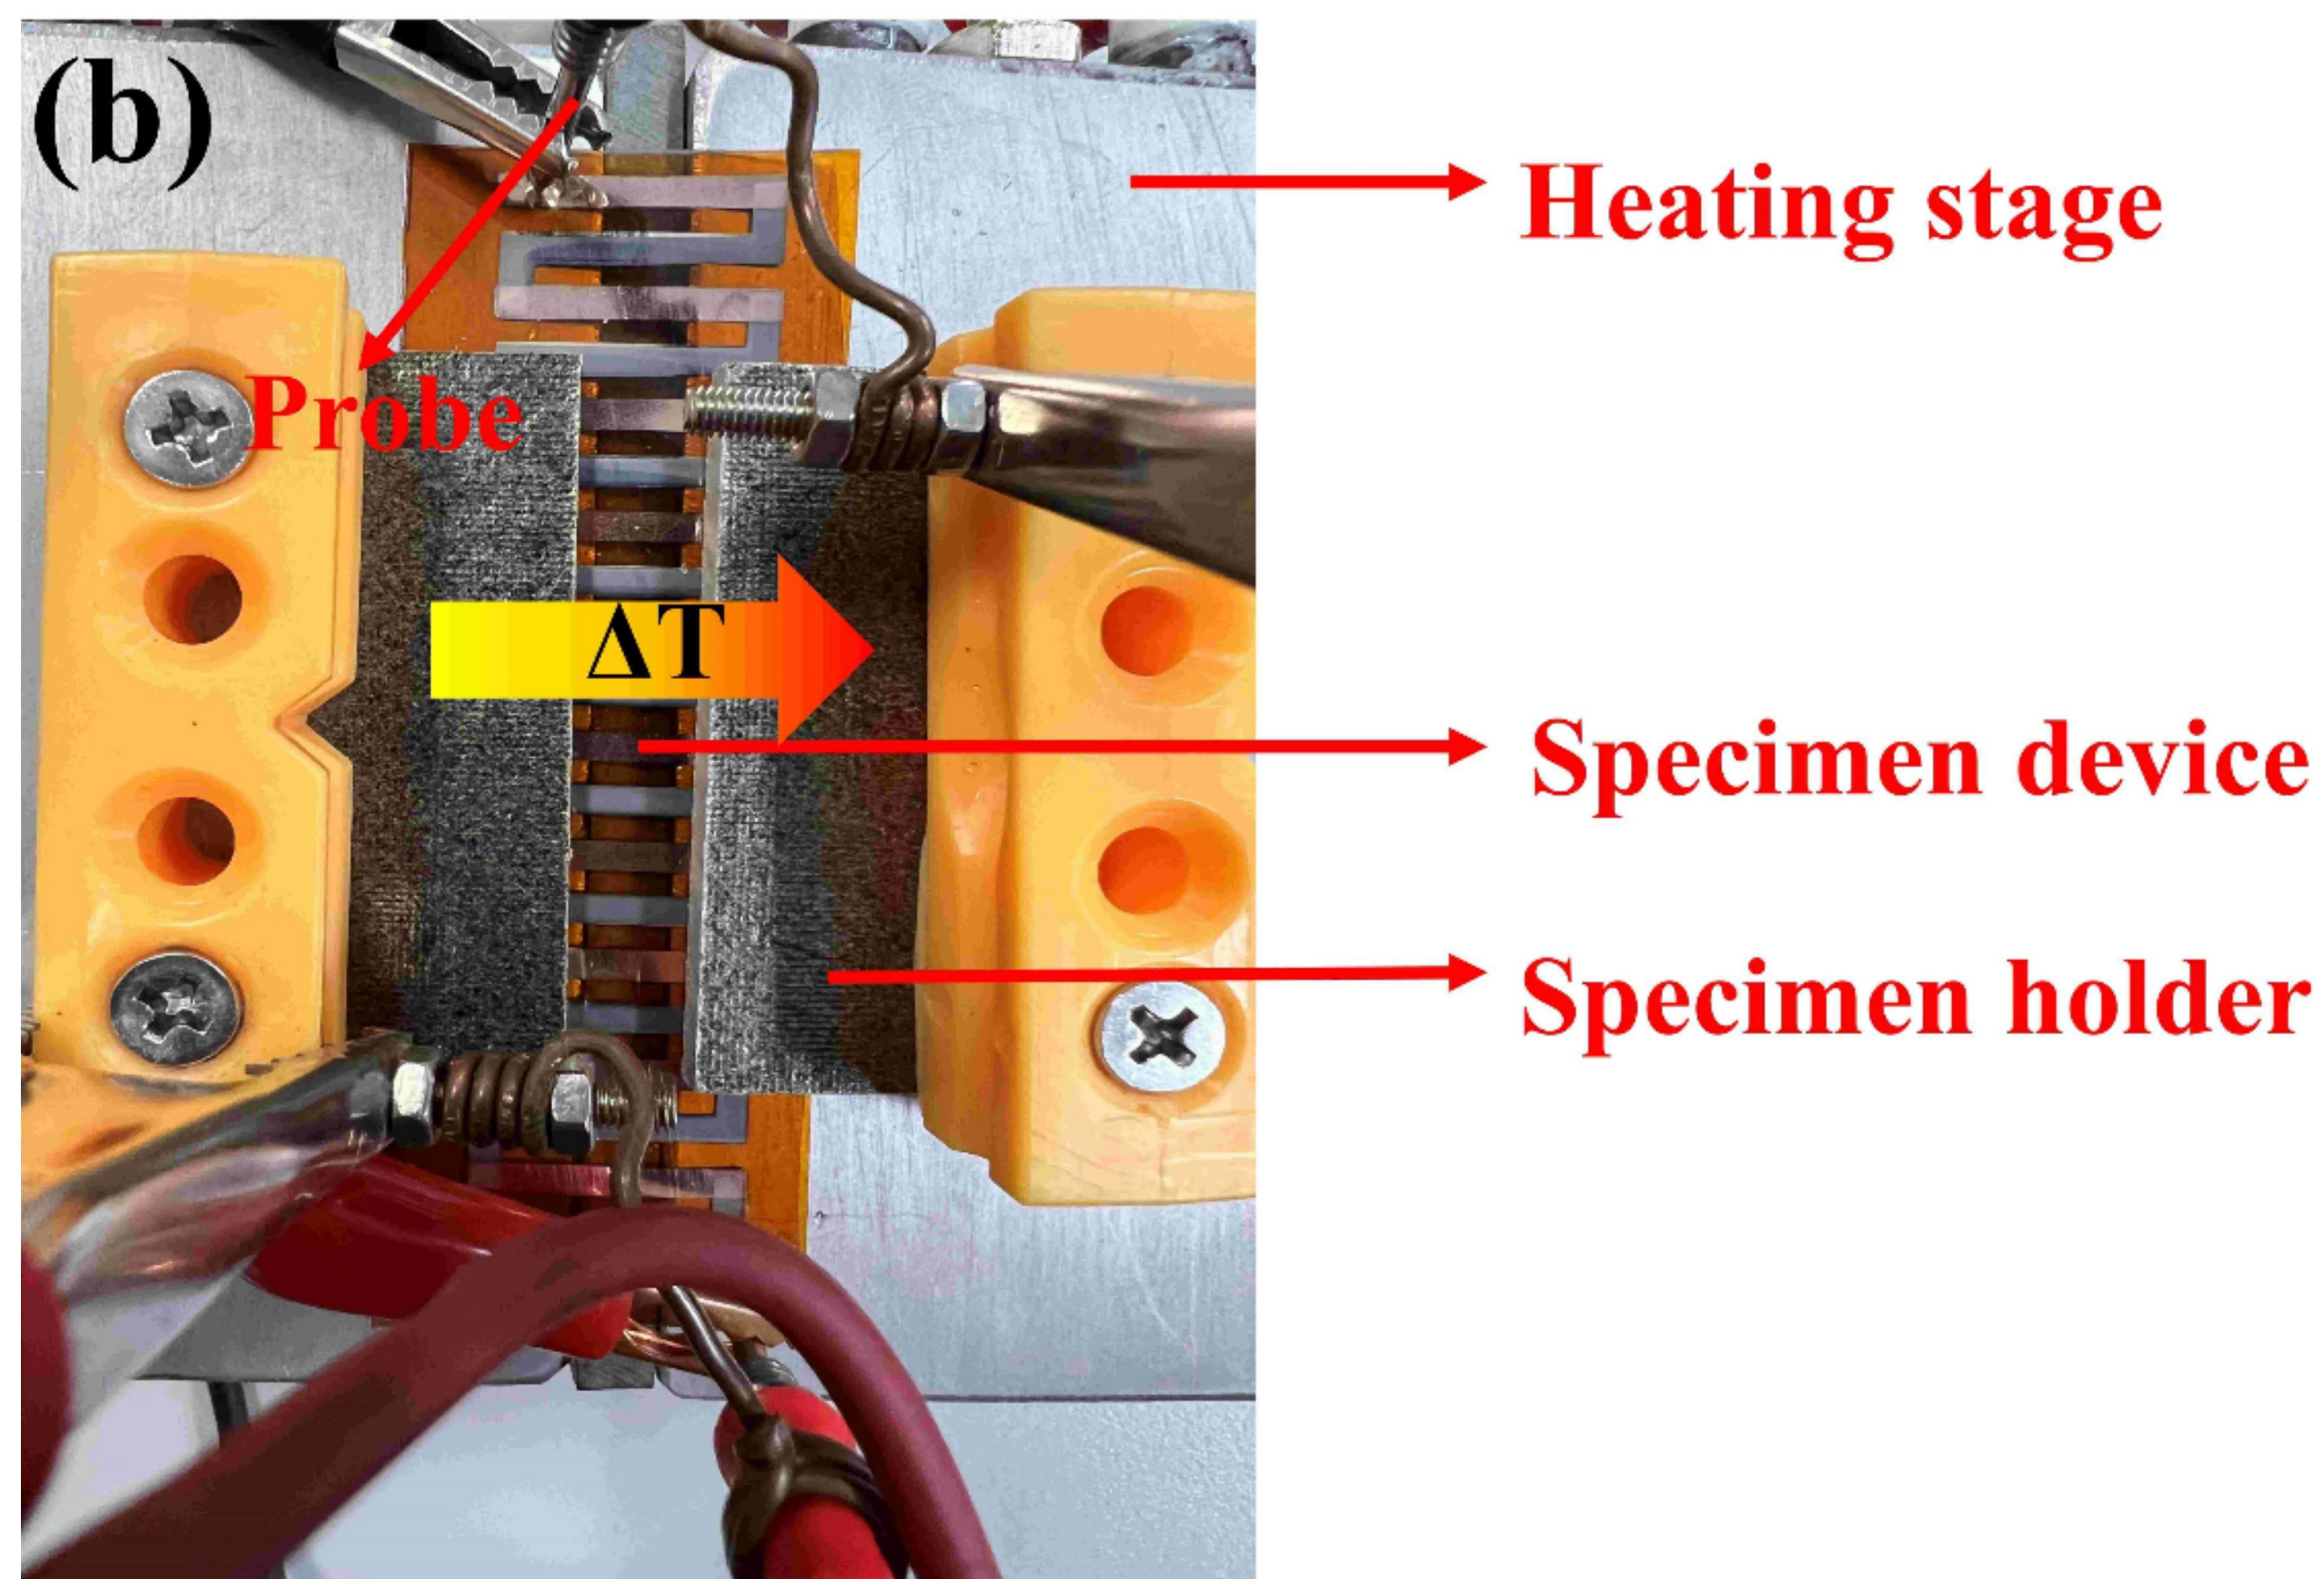

Supplement: d4sc07793h2.pdf [file d4sc07793h2.pdf]
